# Supplementary material
Source: Springer Nature journal article supplement (https://www.springermedizin.de/resource/supplementary/12985_2007_266_MOESM6_ESM.pdf/9607666)

**A**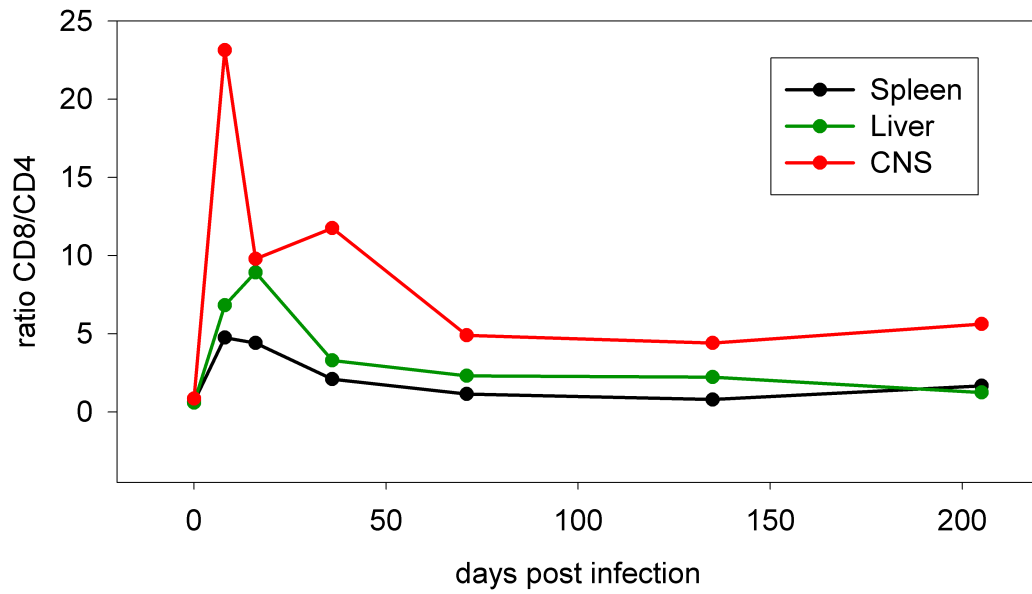**B**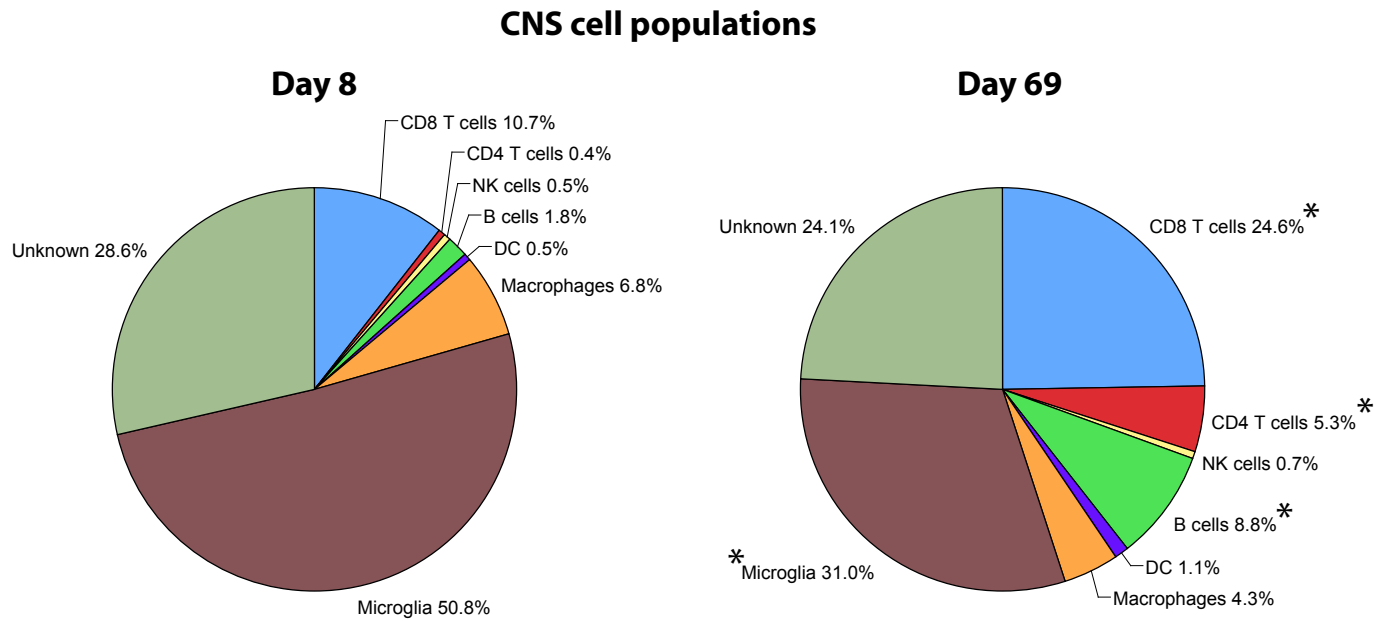**C**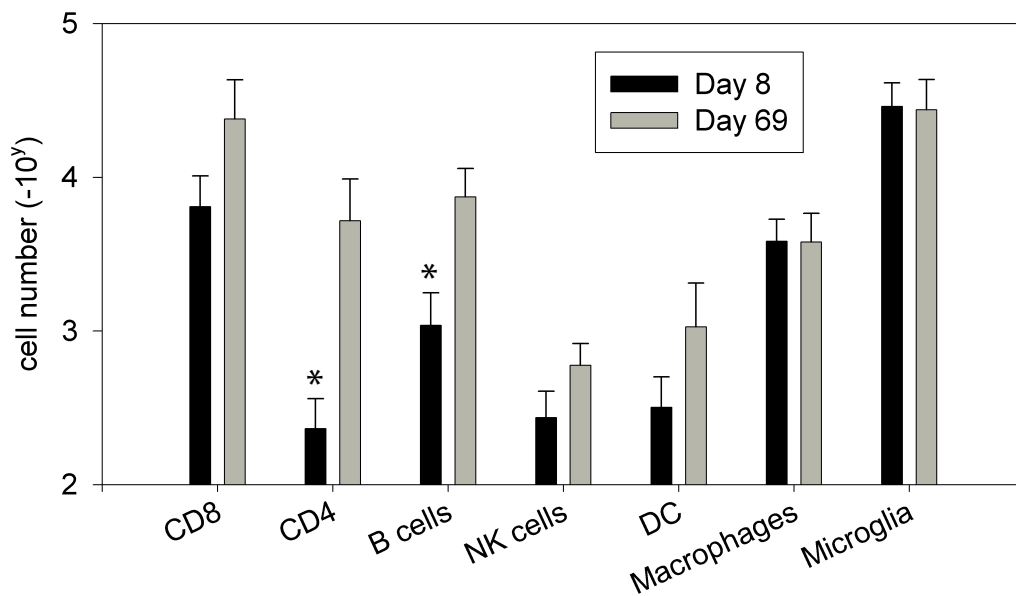

Supplement: MOESM6 [file 9607666]
